**Title: Another doubling of excess mortality in the United States relative to its European peers between 2017 and 2021**

**(Corresponding) Author: Patrick Heuveline, PhD**

Faculty Associate Director, California Center for Population Research at UCLA

4284 Public Affairs Bldg, MC 723603

PO Box 957236

Los Angeles, CA 90095, U.S.A

heuveline@ucla.edu

310-825-6380

## Abstract

A mortality gap has emerged between the United States and other high-income nations before the pandemic and was estimated to account for one in seven US deaths in 2017. International comparisons in Covid-19 mortality suggest both the number and proportion of US deaths that can be attributed to this gap should have increased during the pandemic.

Publicly available data on deaths from all causes and 2020-2021 Covid-19 death counts in the United States and five European countries, were combined with population estimates by sex and age group in these European countries to produce sex- and age-specific mortality rates. These rates are averaged and applied to the US population by sex and age-group to compare the resulting and actual US death counts.

This counterfactual reveals 892,491 excess deaths in the United States in 2021—deaths that would have been prevented had the United States achieved the average mortality rates of its main West European peers. Excess deaths doubled between 2017 and 2021, with most of the increase occurring during the pandemic (89.1% increase between 2019 and 2021). Population change contributed little to the 2017-2021 increase in excess deaths (42,317 additional deaths, 9.4% of the increase). Covid-19 mortality alone continue contributed 230,672 excess deaths in 2021 (51.2%), more than 2020, whereas other causes of deaths contributed 177,235 more excess deaths in 2021 than in 2017 (39.4% of the increase).

In 2021, excess mortality in the United States relative to its European peers accounted for 25.8% of all deaths (3,426,249), up from 15.7% in 2017. The increase was driven in part by the large share of Covid-19 deaths that are excess deaths (relative to European Covid-19 mortality rates), a proportion that has hovered around 50% but increased to 63.3% in 2021 as US vaccination rates plateaued at lower levels than in European countries. The overall increase in mortality from other causes during the pandemic increasingly separates the United States from West European countries as well.

## Keywords

Mortality, Covid-19, Attributable deaths

## Statements

### *Funding Statement*

The author benefited from facilities and resources provided by the California Center for Population Research at UCLA (CCPR), which receives core support (P2C-HD041022) from the Eunice Kennedy Shriver National Institute of Child Health and Human Development (NICHD).

### *Conflict of Interest Disclosure*

The author has no conflict of interest.

### *Ethics Approval Statement*

The study has no human subjects. All data are publicly available and contain no identifying information.

### *Patient Consent Statement*

The study was conducted without patient involvement. Patients were not invited to comment on the study design and were not consulted to develop patient relevant outcomes or interpret the results. Patients were not invited to contribute to the writing or editing of this document for readability or accuracy.

### *Data Statement*

All materials from other sources are publicly available.

## 1. Introduction

The pre-pandemic emergence of a gap in mortality between the United States and other high-income nations is well documented. Arguably the most salient measure of a mortality gap is the number of “excess deaths” that attributable to the corresponding mortality differences. Excess deaths are estimated by subtracting from the actual number of deaths a counterfactual number of deaths obtained after substituting more favorable mortality rates to the prevailing rates. In recent months, the concept has been primarily used to assess the impact of the pandemic by substituting actual mortality rates with (lower) pre-pandemic rates. But the concept has long been used to assess the consequences of mortality differentials between population sub-groups, e.g., racial/ethnic differentials,<sup>1</sup> and between populations.<sup>2</sup> In this article, the number of US excess deaths similarly refers to the difference between an actual number of deaths in the United States and a counterfactual number derived by applying the sex- and age-specific death rates observed in other countries to the US population by age and sex. Using a weighted average of the five largest West European countries, this number was shown to have increased from 226,165 in 2000 to 400,732 in 2017, one in seven deaths that year (14.2%).<sup>3</sup>

Partial evidence suggested this gap has grown at an accelerated pace during the pandemic. Data for the first 12 months of the pandemic show higher sex- and age-specific death rates from Covid-19 in the United States than in the same five countries. The difference translated to 132,173 more deaths in 2020, growing, by the end of March 2021, to 190,867 more deaths over the previous 12 months.<sup>4</sup> This study expands these estimates using both all-cause and Covid-19 mortality data for all of 2020 and 2021.

## 2. Material and methods

This study first estimates excess deaths from all causes in the United States from the Human Mortality Database’s Short-Term Fluctuation Series (STFS).<sup>5</sup> These data include death counts and death rates for every week up to the end of 2021 in the same countries, by sex and five large age groups (0-14, 15-64, 65-74, 75-84 and 85+). To compare with an earlier estimate for 2017 that benefited from disaggregated data by single year of age<sup>3</sup> (still unavailable for 2020 and 2021 at this writing), excess deaths were first re-estimated for 2017. Two sets of annual estimates were derived. The first one used as counterfactual death rates for the US the arithmetic (unweighted) average of the year, sex, and age-group specific death rates in each of the five European countries. The second one used a population-weighted average, that is, deaths and population size for each year, sex, and age-group in the five European countries were added separately, and a corresponding death rate was obtained by dividing total deaths by total population size.

As shown in Table 1, estimates based on STFS data retrieved in January 2022 were quite close to the estimate based on single-year-of-age data (400,732 excess deaths): 389,305 excess deaths with the weighted average and 412,232 excess deaths with the arithmetic average of the five European rates. Due to updated US death rates, including for 2017, estimates based on STFS data retrieved in June 2022 (442,267 and 465,069 excess deaths) are no longer comparable to the original estimate based on single-year-of-age data.

Excess deaths were then calculated for each year from 2017 to 2021 using the weighted average of the European rates. To assess the contribution of population changes to the 2017-2021 trend in excess deaths, another set of annual estimates was derived by holding the US sex and age groups to their 2017 size. To assess the specific contribution of Covid-19 mortality in 2020 and 2021 and its dynamics, counterfactual numbers of Covid-19 deaths in the United States were estimated for each calendar year, 2020 and 2021, as well as for the three four-quarter periods in between (ending in the first, second and third quarter of 2021 respectively). Because countries report their Covid-19 deaths by age using different age groupings,<sup>6</sup> the previous approach was modified as follows.

The US sex- and age-specific rates of death attributed to Covid-19 for each period was derived from Covid-19 death counts from the Centers for Disease Control and Prevention's National Center for Health Statistics (NCHS)<sup>7</sup> and mid-year US population estimates by age and sex from the United Nations (UN) Population Division.<sup>8</sup> These rates were then combined with mid-year population estimates by age and sex from the UN to estimate a counterfactual number of Covid-19 deaths for France, Germany, Italy, Spain, the United Kingdom and the United States in each of these periods. Comparative Mortality Ratios (CMR) of deaths attributed to Covid-19, as reported on the Johns Hopkins University (JHU) dashboard,<sup>9</sup> to the corresponding counterfactual numbers above were then calculated for the US and the aggregate of the five European countries in each period. Due to slight differences between the US numbers reported by NCHS and JHU, the US CMR are not exactly equal to unity. To account for these reporting differences, the European CMRs was divided by the corresponding US CMR in each period. This CMR ratio was taken to represent the fraction of deaths attributed to Covid-19 deaths in the United States that would have occurred in the absence of international differences in Covid-19 mortality and completeness of reporting Covid-19 deaths. The remainder are considered to represent the share of deaths attributed to Covid-19 in each period that are excess deaths (relative to the five European countries).

### 3. Results

From 2017 to 2021, both the absolute number of excess deaths and the proportion of all US deaths that are excess deaths have increased. Based on the weighted average of the rates for each of the European countries, excess deaths are estimated to have doubled from 442,267 (15.7% of all deaths in 2017) to 892,491 (25.8% of all deaths in 2021, Table 2). Population changes only accounted for a small fraction of the 2017-2021 increase in excess deaths. Holding US age groups at their 2017 sizes only reduces the 2017-2021 increase by 42,317 excess deaths (9.4% of the 2017-2021 increase).

More than half of the 2017-2021 increase in excess deaths (51.2%) can be attributed to differences in Covid-19 mortality between the United States and the European countries. The number of US deaths attributed to Covid-19 that can be considered as excess deaths (relative to European peer countries) increased substantially from 121,366 in 2020 to 230,672 in 2021 (Table 2). This dynamic is further described in Figure 1 which also shows total number of deaths attributed to Covid-19 and excess deaths among those for the three intermediate 12-month periods between calendar years 2020 and 2021. The increasing number of deaths attributed to Covid-19 that are excess deaths results from an increase in the fraction of excess deaths among Covid-19 deaths that more than compensate the modest decline in

the number of deaths attributed to Covid-19 in a 12-month period (69,582 fewer deaths in 2021 than in the first 12 months of pandemic mortality, April 1<sup>st</sup>, 2020 to April 1<sup>st</sup>, 2021). Relatively stable until mid-2021 (from 34.6% for 2020 to 37.2% for the mid-2020 to mid-2021 period), that fraction decreased to 29.2% in the 12-month period ending on October 1st, 2021 before bouncing back to 48.2% for the calendar year 2021.

Table 3 shows the distribution of 2021 excess deaths by sex and large age groups as well as the proportion of deaths in each sex and age-groups that can be considered as excess deaths. The majority of 2021 excess deaths occurred between the ages of 15 and 64, 31.0% being male and another 19.1% being female. The highest proportions of excess deaths are also found between these ages, but the proportion is even higher for females (49.6%) than for males (46.4%).

#### 4. Discussion

This study suggests that the impressive increase in the number of excess deaths in the United States relative to peer West European countries between 2000 and 2017 (77.2%),<sup>3</sup> was followed by an even larger increase, a doubling in only four years (2017-2021). While death data by single year of age are not yet available to fully replicate the analysis from 2017 up to the present, data by large age groups provide a close approximation and demonstrate an unambiguous trend. From 2017 to 2019, excess deaths increased by another 6.7%, bringing the total increase between 2000 and 2019 to 89.1%. Excess deaths increased by almost exactly the same proportion (89.1%) in the next two years, approaching 900,000 deaths in 2021 (892,491). Between 2000 and 2021, the proportion of US deaths that would have been avoided had there been no difference in sex- and age-specific death rates between the United States and these peer countries has also surged from roughly one in seven in 2017 (14.2%)<sup>1</sup> to more than one in four in 2021 (25.8%).

Several factors contributed to the surge. As between 2000 and 2017, population change (growth and aging) played a relatively small role in the increase since 2017. Higher rates of death attributed to Covid-19 in the United States than in the comparison countries contributed the bulk of the 2017-2021 increase in excess deaths. Through mid-2021, these higher rates might be attributed in part to comorbidities known to increase Covid-19 case fatality rate. The gap in Covid-19 death rates remained relatively stable, and the contribution to excess deaths of deaths attributed to Covid-19 largely followed trends in the total number of such deaths.<sup>4</sup> For the second half of the year, differences in vaccination likely contributed to trend shown in Figure 1. The gap in Covid-19 death rates first narrowed as vaccines became available to the general population earlier in the United States than in Europe, except for the United Kingdom. By the end of 2021, however, vaccination rates in the United States were plateauing at lower levels than those achieved in the West European countries,<sup>10</sup> and the contribution of Covid-19 mortality to overall excess mortality had grown substantially larger than in 2020.

However, population change and differences in rates of death attributed to Covid-19 do not fully account for the 2017-2021 increase in the number of excess deaths, suggesting increasing differences in mortality from other causes as well. Differences in mortality from other causes contributed an additional 177,235 excess deaths between 2017 and 2021, accounting for 39.4% of the total 2017-2021

increase in excess deaths. Early in the pandemic, the increased contribution of other-cause mortality might have reflected the under-reporting of Covid-19 deaths in the United States,<sup>11</sup> to a degree similar to that observed only in the most affected West European countries (Italy and Spain). Over time, however, trends in mortality from other causes appeared to diverge indeed. Mitigating policies could as plausibly be expected to result in fewer deaths from some causes (e.g., from reduction in motor-vehicle traffic)<sup>12</sup> but in more deaths from other causes (e.g., because of the impact of the pandemic on the quality of hospital care).<sup>13</sup> While the net effect has been a substantial reduction in deaths from other causes in the five European countries, partially compensating the additional deaths directly attributable to Covid-19,<sup>14</sup> the United States has experienced an overall increase in deaths from other causes,<sup>15</sup> in particular deaths involving synthetic opioids<sup>16</sup> or alcohol.<sup>17</sup>

Even though nearly three quarters of Covid-19 deaths in the United States are at age 65 and above (74.6% in 2020-2021)<sup>7</sup> excess mortality continues to be dominated by adult deaths between the ages of 15 and 64, in terms of both the proportion of excess deaths falling in this age group (50.1%) and the share of deaths in this age group that are excess deaths (49.6% for females, 46.4% for males). The proportion of *all* US deaths that were “excess deaths” in 2021 is now exceeding the fraction of US deaths at ages 50 and over that were attributable to smoking in 2003 (24%),<sup>18</sup> and approaching the fraction of adult deaths (ages 20-64) attributable to alcohol in Russia in 2002 (29%),<sup>19</sup> some of the most severe recent public health crises in high-income countries. The dramatic surge in excess mortality in the United States during the pandemic is, in Eileen Crimmins’ words, “an acute demonstration of our chronic problem.”<sup>20</sup> Both these international differences and the pandemic’s disproportionate impact on minority populations in the United States<sup>21,22</sup> highlight social conditions as fundamental causes of diseases and deaths.<sup>23</sup>

## References

1. Wrigley-Field, E. (2020). US racial inequality might be as deadly as COVID-19. *Proc Natl Acad Sci U S A*, 117(36) 21854-21856. <https://doi.org/10.1073/pnas.2014750117>
2. Heuveline, P., Guillot, M. & Gwatkin, D. (2002). The uneven tides of the epidemiological transition. *Soc Sci Med* 55(2) 313–322. [https://doi.org/10.1016/s0277-9536\(01\)00172-1](https://doi.org/10.1016/s0277-9536(01)00172-1)
3. Preston, S. H. & Vierboom, Y. C. (2021). Excess mortality in the United States in the 21<sup>st</sup> century. *Proc Natl Acad Sci U S A*, 118, Article e2024850118. <https://www.pnas.org/doi/10.1073/pnas.2024850118>
4. Heuveline, P. (2022). The COVID-19 pandemic adds another 200,000 deaths (50%) to the annual toll of excess mortality in the United States. *Proc Natl Acad Sci U S A*, 118, Article e2107590118. <https://www.pnas.org/doi/10.1073/pnas.2107590118>
5. Jdanov, D.A., Alustiza-Galarza, A., Shkolnikov, V. M., Jasilionis, D., Németh, L. et al. (2021). The short-term mortality fluctuations data series, monitoring mortality shocks across time and space. *Sci Data*, 8, Article 235. <https://www.nature.com/articles/s41597-021-01019-1>
6. Caporali, A., Garcia, J., Couppié, É., Poniakina, S., Barbieri, M., Bonnet, F. et al. (2022). The demography of COVID-19 deaths database, a gateway to well-documented international data. *Sci Data*, 9, Article 93. <https://www.nature.com/articles/s41597-022-01191-y>
7. NCHS. Provisional COVID-19 deaths by age and sex. <https://data.cdc.gov/NCHS/Provisional-COVID-19-Death-Counts-by-Sex-Age-and-S/9bhg-hcku>
8. United Nations. World Population Prospects 2019, online edition. <https://population.un.org/wpp/Download/Standard/Interpolated/>
9. Johns Hopkins University. Coronavirus Resource Center. <https://coronavirus.jhu.edu>
10. Our World In Data (OWID). Coronavirus (COVID-19) vaccinations. <https://ourworldindata.org/covid-vaccinations>
11. Ackley, C. A., Lundberg, D. J., Ma, L., Elo, I. T., Preston, S. H. & Stokes, A. C. (2022). County-level estimates of excess mortality associated with COVID-19 in the United States. *SSM Popul Health*, 17, Article 101021. <https://doi.org/10.1016/j.ssmph.2021.101021>
12. Yasin, Y. J., Grivna, M. & Abu-Zidan, F. M. (2021). Global impact of covid-19 pandemic on road traffic collisions. *World J Emerg Surg*, 16, Article 51. <https://doi.org/10.1186/s13017-021-00395-8>
13. Mansfield, K. E., Mathur, R., Tazare, J. et al. (2021). Indirect acute effects of the COVID-19 pandemic on physical and mental health in the UK: a population-based study. *Lancet Digit Health*, 3, E217-E230. [https://doi.org/10.1016/S2589-7500\(21\)00017-0](https://doi.org/10.1016/S2589-7500(21)00017-0)



14. Pison, G. & Meslé, F. (2021). France 2020: 68,000 excess deaths attributable to COVID-19. *Population & Societies*, 587. <https://www.ined.fr/en/publications/editions/population-and-societies/france-2020-68000-additional-deaths-attributable-covid-19-epidemic/>
15. Ahmad, F. B. & Anderson, R. N. (2021). The leading causes of death in the US for 2020. *JAMA*, 325, 1829-1830. <https://doi.org/10.1001/jama.2021.5469>
16. National Institute on Drug Abuse. Overdose death rates. Accessed April 19, 2022. <https://nida.nih.gov/drug-topics/trends-statistics/overdose-death-rates>
17. White, A. M., Castle, I.-J. P., Powell, P. A., Hingson, R. W. & Koob, G. F. (2022). Alcohol-related deaths during the COVID-19 pandemic. *JAMA*. <https://doi.org/10.1001/jama.2022.4308>
18. Preston, S. H., Gleij, D. A. & Wilmoth, J. R. (2010). A new method for estimating smoking-attributable mortality in high-income countries. *Int J Epidemiol*, 39, 430-438. <https://doi.org/10.1093/ije/dyp360>
19. Rehm, J., Sulkowska, U., Mańczuk, M., Boffetta, P., Powles, J., Popova, S., Zatoński, W. (2007). Alcohol accounts for a high proportion of premature mortality in central and eastern Europe. *Int J Epidemiol*, 36, 458-467. <https://doi.org/10.1093/ije/dyl294>
20. Crimmins, E. (2021) Life expectancy and health expectancy in the 21<sup>st</sup> century: the unthinkable, the inconceivable, and the unknowable. *PAA Presidential Address 2021*. <https://www.youtube.com/watch?v=yItaGA4GpNE&t=1364s>.
21. Andrasfay, T. & Goldman, N. (2021). Association of the COVID-19 pandemic with estimated life expectancy by race/ethnicity in the United States, 2020. *JAMA Network Open*, 4, Article e2114520. <https://doi.org/10.1001/jamanetworkopen.2021.14520>
22. Woolf, S. H., Masters, R. K. & Aron, L. Y. (2022) Changes in life expectancy between 2019 and 2020 in the US and 21 peer countries. *JAMA Network Open*, 5, Article e227067. <https://doi.org/10.1001/jamanetworkopen.2022.7067>
23. Link, B. G. & Phelan, J. (1995). Social conditions as fundamental causes of diseases. *J Health Soc Behav.*, 35, 80-94. <https://doi.org/10.2307/2626958>

## Tables

Table 1: Comparison of excess-mortality estimates for 2017, number of excess deaths and proportion of all deaths, by data source and averaging method

|                                          | Arithmetic mean |            | Weighted average |            |
|------------------------------------------|-----------------|------------|------------------|------------|
|                                          | Number          | Proportion | Number           | Proportion |
| One-year age groups, October 2020 data   | 400,732         | 14.2%      |                  |            |
| Five large age groups, January 2022 data | 412,232         | 14.7%      | 389,305          | 13.9%      |
| Five large age groups, June 2022 data    | 465,069         | 16.5%      | 442,267          | 15.7%      |

Notes: Estimate using October-202 data in one-year age groups (from Human Mortality Database), with arithmetic mean of European countries as counterfactual is from Preston and Vierboom (2021).<sup>3</sup> Other estimates are author's calculations from the Short-Term Fluctuation Series (STFS).<sup>5</sup> See text for estimation details.

Table 2: Annual estimates of excess mortality in the United States (number of excess deaths and proportion of all deaths) and contributions to 2017-2021 change

|                                       | Year    |         |         |         |         |
|---------------------------------------|---------|---------|---------|---------|---------|
|                                       | 2017    | 2018    | 2019    | 2020    | 2021    |
| Total number of excess deaths         | 442,267 | 433,811 | 471,992 | 745,109 | 892,491 |
| Proportion of all deaths              | 15.7%   | 15.3%   | 16.5%   | 22.2%   | 25.8%   |
| Total number with 2017 population     | 442,267 | 427,968 | 459,122 | 716,455 | 850,174 |
| Proportion with 2017 population       | 15.7%   | 15.4%   | 16.7%   | 22.3%   | 25.8%   |
| Contribution of population change     |         | 5,843   | 12,870  | 28,654  | 42,317  |
| Proportion of change in excess deaths |         | -69.1%  | 43.3%   | 9.5%    | 9.4%    |
| Contribution of Covid-19 mortality    |         |         |         | 121,366 | 230,672 |
| Proportion of change in excess deaths |         |         |         | 40.1%   | 51.2%   |
| Contribution of other-cause mortality |         | -14,299 | 16,855  | 152,822 | 177,235 |
| Proportion of change in excess deaths |         | 169.1%  | 56.7%   | 50.5%   | 39.4%   |

Notes: Author's calculations from the Short-Term Fluctuation Series (STFS),<sup>5</sup> with population-weighted average of European countries as counterfactual. See text for estimation details.

Table 3: Sex and age distribution of 2021 excess deaths in the United States, and proportion of all deaths in sex and age group

|                                       | 0-14  | 15-64   | 65-74   | 75-84  | 85+    |
|---------------------------------------|-------|---------|---------|--------|--------|
| Females                               | 5,685 | 170,268 | 112,059 | 94,141 | 53,944 |
| Males                                 | 7,253 | 276,648 | 97,449  | 53,588 | 21,457 |
| Proportion of all-age excess deaths   |       |         |         |        |        |
| Females                               | 0.6%  | 19.1%   | 12.6%   | 10.5%  | 6.0%   |
| Males                                 | 0.8%  | 31.0%   | 10.9%   | 6.0%   | 2.4%   |
| Proportion of all deaths in age-group |       |         |         |        |        |
| Females                               | 43.1% | 49.6%   | 36.8%   | 23.8%  | 9.6%   |
| Males                                 | 44.0% | 46.4%   | 23.3%   | 12.4%  | 5.8%   |

## Figure

Figure 1: US deaths attributed to COVID-19 and their contribution to excess deaths, by 12-month period

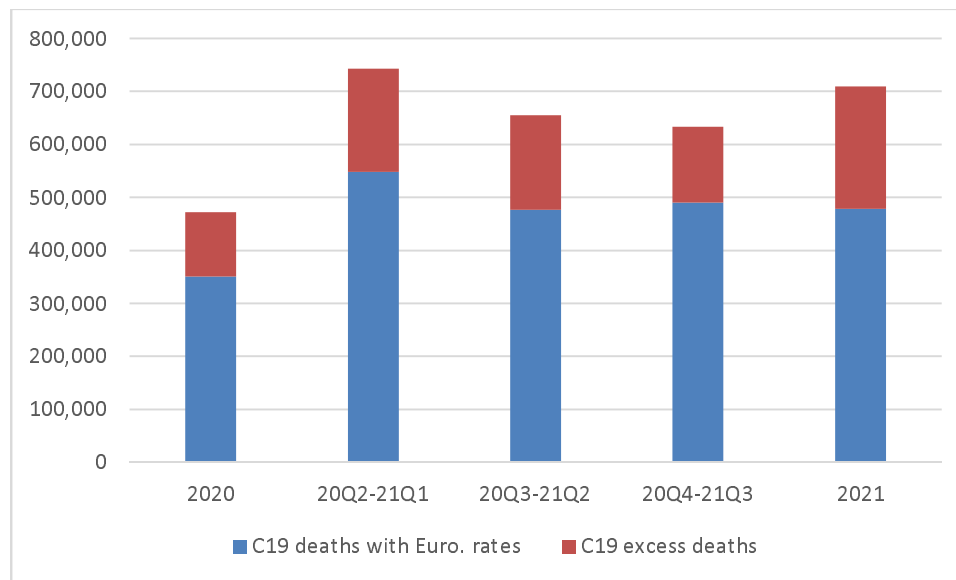

Note: The number of deaths attributed to Covid-19 in each 12-month period is the sum of Covid-19 deaths estimated from the population-weighted average of the five European countries death rates from Covid-19 (in blue) and the excess deaths from Covid-19 (in red). The first (left) and last (right) periods are calendar years. Intermediate 12-month period are shifted by one quarter each: i.e., 20Q2-21Q1 refers to the period from April 1<sup>st</sup>, 2020 to April 1<sup>st</sup>, 2021.
